# Supplementary material
Source: publisher figshare collection journal article supplement (https://karger.figshare.com/ndownloader/files/27958317)
Supplement: Supplementary file 1 [file 27958317]

## **Supplementary Methods**

### **Whole exome sequencing**

For the two individuals in this family, sequence reads were converted from Illumina fastq format to fastq files that were compatible with the Sanger sequencing specification. Sequencing reads were aligned with the human reference sequence (hg19) using Burroughs Wheeler Alignment (BWA) version 0.7.17 and default parameters [1]. Alignments were converted from SAM format to BAM files with SamTools [2]. Duplicate reads were removed from BAM files and a base quality score was recalibrated using GATK 4.1.2.0 [3]. Genotype calling was executed with the GATK 4.1.2.0 Haplotype Caller. Filtering was performed to remove variants with QD (variant confidence/quality by depth) <2.0, FS (phased-scaled p-value using Fisher's exact test to detect strand bias) >60.0, MQ (RMS mapping quality) < 40.0, MQRankSum (Z-score from Wilcoxon rank sum test Alt vs. Ref read mapping qualities <-12.5, and ReadPosRankSum <-8.0, SOR > 4.0).

Output files from GATK were converted to VCF format. All sets of single nucleotide variant (SNV) and indel variant calls from GATK were annotated using the ANNOVAR 2019Mar20 program to identify exonic or splicing variants with their allele frequencies and functional information [4]. Locations and genotypes of variants for each individual were identified to localize subsets of variants on autosomal chromosomes. Annotations were assigned to all variants using the ANNOVAR 2019Mar20 program on the basis of their frequency in the National Heart, Lung and Blood Institute Exome Sequencing Project (ESP6500), the 1000 Genomes Project, The Genome Aggregation Database (gnomAD), and 2 Japanese databases, which are 4.7KJPN in jMorphy by Tohoku Medical Megabank Organization (ToMMO) and Human Genetic Variation Database (HGVD) [6-10]. Impacts of variants on coding features were examined against the following three databases: ensGene tracks from Ensembl Genes; knownGene tracks from the University of California, Santa Cruz Known Genes; and refGene tracks from the National Center for Biotechnology Information Reference Sequence Database [4, 5]. The candidate gene variants were presumed to be a potential heterozygous mutation because of autosomal dominant inheritance in the family. Candidate variants were selected if they met the following criteria: 1) minor allele frequency of <0.1% in the total population in 1000 Genomes Project, ESP6500, gnomAD, 4.5KJPN and HGVD; 2) PASS in variant filtering; 3) either nonsynonymous, splice site, insertion/deletion, stop gain/loss, or unknown variants in at least one database; and 4) an exonic or a splice site in at least one database. American College of Medical Genetics and Genomics (ACMG) standards and guidelines were used to determine the pathogenicity of variants [6]. Copy number variations for each sample were analyzed using the CLC Genomics Workbench version 20.0 (Arhus, Denmark) with the default parameters.

### **Confirmation of the patient's variant using Sanger sequencing**

Validation of the patient's variant (ch20:39316901G>T) was performed using genomic polymerase chain reaction (PCR) and Sanger sequencing. PCR was conducted using PrimeSTAR MAX DNA polymerase (Takara, Tokyo, Japan) in accordance with the manufacturer's instructions. The primers for genomic PCR were as follows: forward primer, 5'-CGTCCCCAGACAAAGGCTTG-3'; reverse primer, 5'-TCACCTCGTCCTTGGTGAAG-3' [7]. For Sanger sequencing, BigDye Terminator Ready Reaction Mix (v3.1) (Thermo Fisher Scientific, Waltham, MA, USA) was used and samples were purified using the BigDye XTerminator purification kit (Thermo Fisher Scientific).

### **Supplementary References**

1. Li H, Durbin R. Fast and accurate short read alignment with Burrows-Wheeler transform. *Bioinformatics*. 2009 Jul 15;25(14):1754-60.
2. Li H, Handsaker B, Wysoker A, Fennell T, Ruan J, Homer N, et al. The Sequence Alignment/Map format and SAMtools. *Bioinformatics*. 2009 Aug 15;25(16):2078-9.
3. McKenna A, Hanna M, Banks E, Sivachenko A, Cibulskis K, Kernytsky A, et al. The Genome Analysis Toolkit: a MapReduce framework for analyzing next-generation DNA sequencing data. *Genome Res*. 2010 Sep;20(9):1297-303.
4. Wang K, Li M, Hakonarson H. ANNOVAR: functional annotation of genetic variants from high-throughput sequencing data. *Nucleic Acids Res*. 2010 Sep;38(16):e164.
5. Genomes Project C, Abecasis GR, Auton A, Brooks LD, DePristo MA, Durbin RM, et al. An integrated map of genetic variation from 1,092 human genomes. *Nature*. 2012 Nov 1;491(7422):56-65.
6. Richards S, Aziz N, Bale S, Bick D, Das S, Gastier-Foster J, et al. Standards and guidelines for the interpretation of sequence variants: a joint consensus recommendation of the American College of Medical Genetics and Genomics and the Association for Molecular Pathology. *Genet Med*. 2015 May;17(5):405-24.
7. Sato Y, Tsukaguchi H, Morita H, Higasa K, Tran MTN, Hamada M, et al. A mutation in transcription factor MAFB causes Focal Segmental Glomerulosclerosis with Duane Retraction Syndrome. *Kidney Int*. 2018 Aug;94(2):396-407.

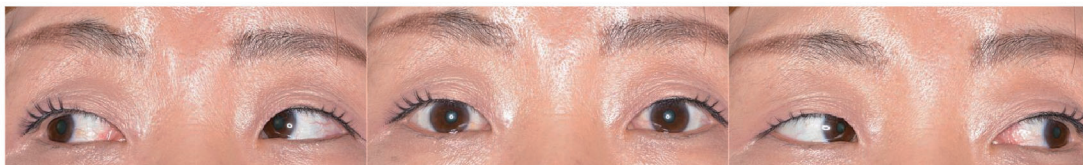

A

Right gaze

Primary gaze

Left gaze

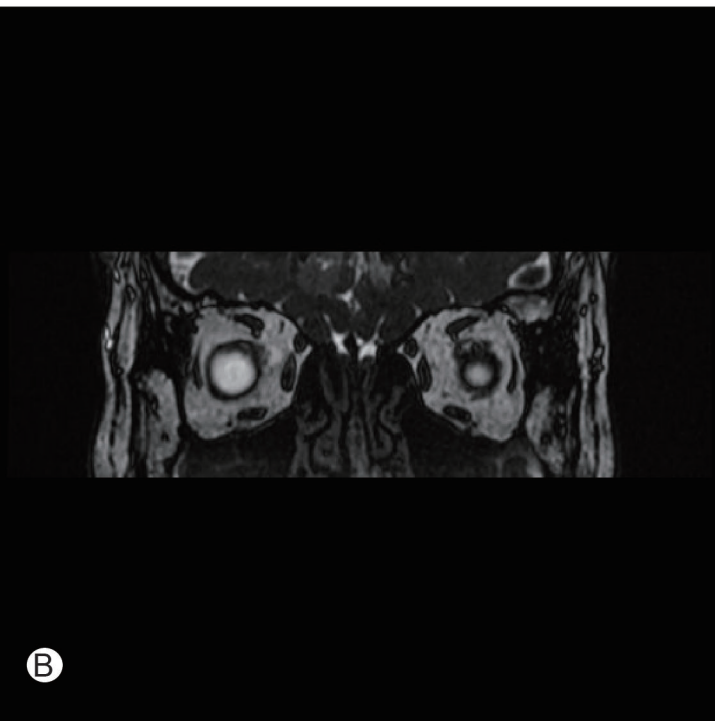

B

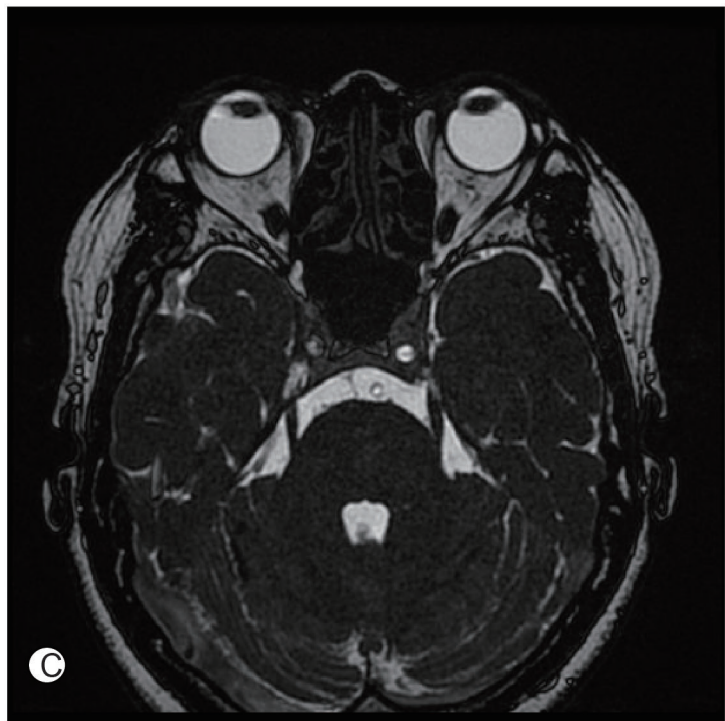

C

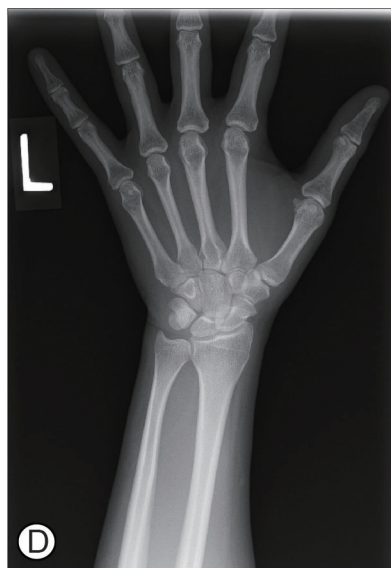

D

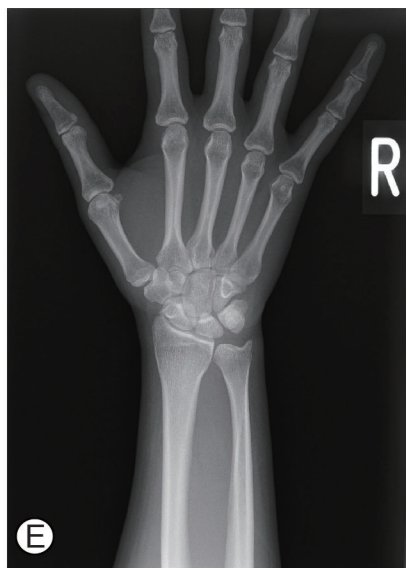

E

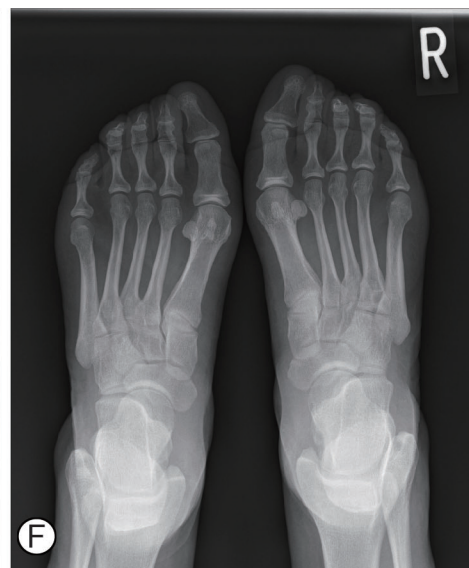

F

Figure S1: Extrarenal manifestations in patient II-1. (A) Eye movement in Patient II-1.

(B) Coronal T1-weighted magnetic resonance image of extraocular muscles.

(C) Axial T2-weighted magnetic resonance image of both abducens nerves.

(D–F) X-ray images of upper and lower extremities.

Table S1. Whole exome sequence data summary

|      | raw data (bp) | trimmed data (bp) | %mapped<br>reads (paired) | called variant number<br>per sample | rare variant<br>number<br>(MAF<0.1%) per<br>sample | II-1 unique rare variant<br>number (MAF<0.1) |
|------|---------------|-------------------|---------------------------|-------------------------------------|----------------------------------------------------|----------------------------------------------|
| II-1 | 7,827,949,200 | 7,824,272,402     | 99.09%                    | 199,585                             | 314                                                | 144                                          |
| II-2 | 9,898,802,200 | 9,894,297,627     | 99.10%                    | 211,342                             | 314                                                |                                              |

Table S2. The 117 candidate genes with 144 rare variants (MAF<0.1%) unique to patient II-1

| Gene Name    | Gene Name     | Gene Name     | Gene Name | Gene Name |
|--------------|---------------|---------------|-----------|-----------|
| PLEKHN1      | C3orf37       | MTUS1         | NXPH4     | P2RX1     |
| KIAA1751     | MUC4          | FGFR1         | PIP4K2C   | MPRIP     |
| ACOT7        | CENPC1        | PABPC1        | METAP2    | TMEM97    |
| ZBTB48       | TXNDC15       | GRHL2         | POLR3B    | CEP112    |
| EXOSC10      | UIMC1         | ARHGAP39      | OAS2      | EMILIN2   |
| ESPNP        | MAML1         | ZBTB5         | SKA3      | WDR18     |
| PDE4DIP      | ATXN1         | DKFZp434P0216 | NUPL1     | APC2      |
| CGN          | HLA-H         | BRD3          | NHLRC3    | AX748210  |
| FLG2         | MUC21         | PITRM1        | LPAR6     | STXBP2    |
| PAQR6        | GPR116        | SLC39A12      | RCBTB1    | MUC16     |
| IQGAP3       | MCM3          | PARD3         | ATP7B     | ZNF788    |
| BCAN         | SYNE1         | LIPF          | PCCA      | HSH2D     |
| CD1E         | HGC6.3        | CEP55         | LINC00346 | ZNF850    |
| GUK1         | C7orf26       | ADRB1         | LRR1      | MGC2752   |
| GCKR;C2orf16 | NFE2L3        | CPXM2         | NOXRED1   | SLC23A2   |
| CCDC148      | BBS9          | TRIM22        | SNW1      | SNAP25    |
| SCN9A        | ABCA13        | PARVA         | abParts   | FRG1B     |
| CCDC141      | ZNF273        | OTOG          | ELL3      | MAFB      |
| ALS2         | POM121        | PHF21A        | WDR76     | SLPI      |
| GLB1L        | CACNA2D1      | TBC1D10C      | ZFAND6    | APCDD1L   |
| ASIC4        | AKR1B1        | GDPD4         | RPS15A    | CRYAA     |
| ALPP         | LUZP6         | MRE11A        | FBRS      |           |
| DYNC1LI1     | TCRBV12S2     | PRMT8         | SLC5A2    |           |
| UBA3         | TCRBV20S1A1N2 | LARP4         | C16orf58  |           |

Table S3. Name list of genes with different copy number between II-1 and II-2.

| Gene Name     | Gene Name    | Gene Name     |
|---------------|--------------|---------------|
| HERC2P4       | IGHV3OR16-15 | FCGR2B        |
| RP11-56L13.7  | IGHV3OR16-6  | FCGR2C        |
| TP53TG3D      | RP11-19N8.2  | ZNF705C       |
| RP11-17M15.4  | IGHV3OR16-10 | FAM66A        |
| ACTR3BP3      | IGHV3OR16-8  | RP11-351I21.7 |
| RP11-626K17.5 | NBPF8        | RP11-351I21.6 |
| ABCD1P3       | AL592284.1   | ZDHHC11       |
| TP53TG3       | PPIAL4B      | RP4-576H24.4  |
| RP11-586K12.8 | RP11-640M9.2 | SIRPB1        |
| HERC2P5       | CROCC        | CCL4L1        |
| IGHV2OR16-5   | HSPA6        | TBC1D3C       |
| SLC6A10P      | RP11-25K21.6 | TBC1D3H       |
| RP11-989E6.3  | FCGR3A       | CCL3L1        |
